# Hot New Winter Titles!

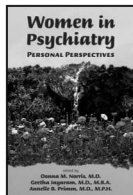

## Women in Psychiatry Personal Perspectives

Edited by Donna M. Norris, M.D.,  
Geetha Jayaram, M.D., M.B.A.,  
and Annelle B. Primm, M.D., M.P.H.

Women entering psychiatry or other health care professions face challenges their male counterparts do not. In *Women in Psychiatry: Personal Perspectives*, 21

female leaders in psychiatric medicine trace the paths they followed to enter and excel in this profession. The book is a testimony to the progress women have made in the field of psychiatry, especially since the feminist movement began in the 1970s.

The stories of these accomplished women are frankly presented and illustrate strategies they have used to balance their private and professional lives and to overcome barriers to their development as women professionals in medical careers. *Women in Psychiatry* clearly demonstrates where an interest in science or medicine can lead when combined with determination, guidance, experience, mentoring, perseverance, and organizational support. Each of their stories is unique. This book offers not only fascinating insights into leadership and achievement, but also inspiration and must-read practical guidance to anyone interested in a similar career.

2012 • 320 pages • ISBN 978-1-58562-408-9 • Paperback • \$65.00 • Item #62408

Coming  
April  
2012!

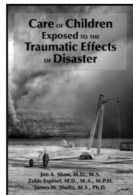

## Care of Children Exposed to the Traumatic Effects of Disaster

Jon A. Shaw, M.D., M.S.,  
Zelde Espinel, M.D., M.A., M.P.H.,  
and James M. Shultz, M.S., Ph.D.

*Care of Children Exposed to the Traumatic Effects of Disaster* is designed to provide professional and volunteer disaster responders who routinely interact

with children with the tools they need to support, intervene, and identify children who need additional help overcoming the traumatic effects of extreme events. The authors are experts in psychiatry and public health.

2012 • 288 pages • ISBN 978-1-58562-426-3 • Paperback • \$54.00 • Item #62426

NEW!

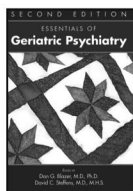

## Essentials of Geriatric Psychiatry, Second Edition

Edited by Dan G. Blazer, M.D., Ph.D.,  
and David C. Steffens, M.D., M.H.S.

*Essentials of Geriatric Psychiatry*, Second Edition, distills the main concepts from *The American Psychiatric Publishing Textbook of Geriatric Psychiatry*,

Fourth Edition, thoroughly covering not only a wide range of important mental disorders in the elderly but also the so-called normal effects of aging that result in biological, social, and behavioral changes in older adults.

2012 • 448 pages • ISBN 978-1-58562-413-3 • Paperback • \$95.00 • Item #62413

NEW!

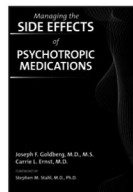

## Managing the Side Effects of Psychotropic Medications

Joseph F. Goldberg, M.D., M.S.,  
and Carrie L. Ernst, M.D.

Foreword by Stephen M. Stahl, M.D., Ph.D.

This book provides a wealth of practical and comprehensive knowledge to help clinicians recognize and navigate the diversity of end-organ psychotropic drug effects. This well-crafted resource will help practitioners better understand the consequences of available drug therapies and practical implications of their treatment decisions.

2012 • 432 pages • ISBN 978-1-58562-402-7 • Paperback • \$65.00 • Item #62402

Coming  
April  
2012!

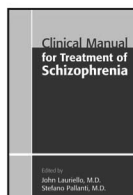

## Clinical Manual for Treatment of Schizophrenia

Edited by John Lauriello, M.D.,  
and Stefano Pallanti, M.D.

This comprehensive volume maintains hope in the future of neuroscientific research and the progress that is being made in the diagnosis and treatment of the disease. With chapters written by a distinguished assembly of international authorities in the field, this book provides a uniquely multicultural and supremely patient-centered perspective on schizophrenia's core symptoms, its psychosocial effects, and its psychopharmacological and psychotherapeutic management.

2012 • 523 pages • ISBN 978-1-58562-394-5 • Paperback • \$79.00 • Item #62394

NEW!

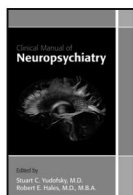

## Clinical Manual of Neuropsychiatry

Edited by Stuart C. Yudofsky, M.D.,  
and Robert E. Hales, M.D., M.B.A.

*Clinical Manual of Neuropsychiatry* offers clinicians the comprehensive, expert guidance that they require to deliver cutting-edge, effective, and compassionate patient care. New residents and veteran clinicians alike will benefit from the book's commonsense, straightforward organization and meticulously researched coverage of neuropsychiatric disorders.

2012 • 447 pages • ISBN 978-1-58562-429-4 • Paperback • \$79.00 • Item #62429

NEW!

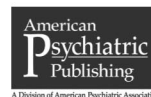

The First and Last Word in Psychiatry

www.appi.org

Email: appi@psych.org Phone: 1-800-368-5777

Find us on and

Priority Code AH1202
