# PSYCHIATRIC SERVICES

## New Benefit for American Psychiatric Association Members-in-Training (MITs)

# Free Online Subscription to Psychiatric Services

Beginning with the January 2012 issue, APA Members-in-Training (MITs) will receive a free online subscription to *Psychiatric Services*.

Simply visit [ps.psychiatryonline.org](http://ps.psychiatryonline.org) for full-text access to all of the content of APA's highly ranked, peer-reviewed monthly journal. *Psychiatric Services* focuses on service delivery in organized systems of care, evolving best practices, and federal and state policies that affect the care of people with mental illnesses.

**Please visit [ps.psychiatryonline.org](http://ps.psychiatryonline.org) and log in with your American Psychiatric Association username and password.**

Psychiatry residents who are not currently an APA Member-in-Training should consider membership in the American Psychiatric Association. The benefits provided to residents are an example of how the APA serves the needs of its members throughout their careers. The low introductory dues APA extends to MITs are even waived for the first year. Please visit <http://www.psych.org/joinapa> for more information.

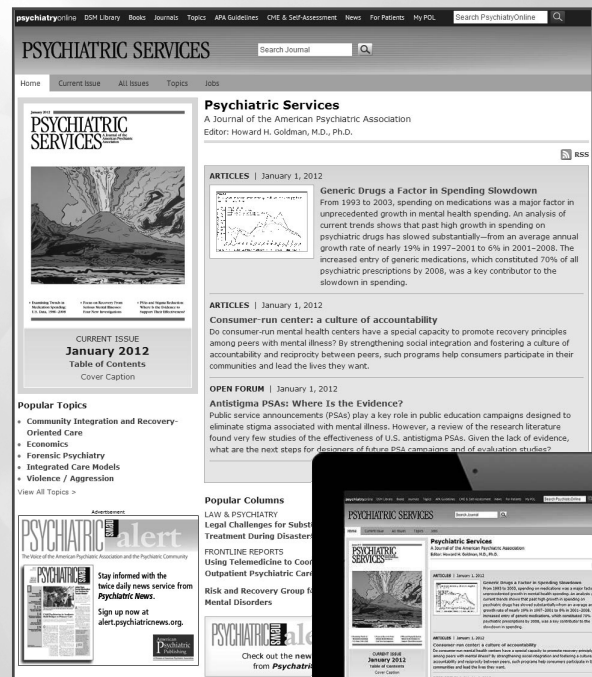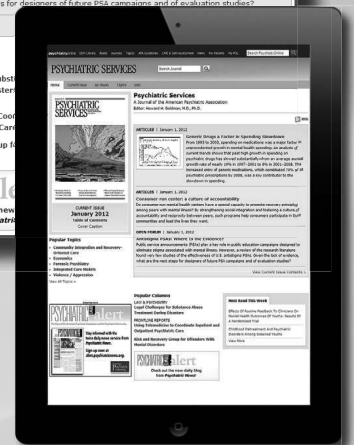

[ps.psychiatryonline.org](http://ps.psychiatryonline.org)

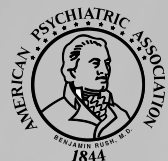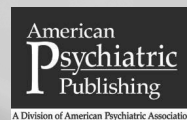

Email: [appi@psych.org](mailto:appi@psych.org)  
Phone: 1-800-368-5777

The First and Last Word in Psychiatry

AH1205A
