# FOCUS

THE JOURNAL OF LIFELONG LEARNING IN PSYCHIATRY



## *Women's Mental Health*

*Guest Editors, Susan G. Kornstein, M.D.  
Anita H. Clayton, M.D.*

### IN CLINICAL SYNTHESIS:

Psychopharmacology in Pregnancy and Postpartum

*Gail Erlick Robinson, M.D., D.Psych., FRCPC*

Postpartum Depression: Advances in  
Recognition and Treatment

*Rita Suri, M.D.  
Lori Altsbuler, M.D.*

Depression During the Menopausal Transition:  
An Update on Epidemiology and Biological Treatments

*Luciano Minuzzi, M.D., Ph.D.  
Benicio N. Frey, M.D., Ph.D.  
Claudio N. Soares, M.D., Ph.D., FRCPC*

AND INFLUENTIAL PUBLICATIONS . . .
